# Supplementary material for: Action history influences subsequent movement via two distinct processes
Source: eLife. 2017 Oct 23;6:e26713. doi: 10.7554/eLife.26713 (PMC5662285; doi:10.7554/eLife.26713)
Supplement: Figure 2—source data 1. [file elife-26713-fig2-data1.xlsx]

## Sheet: Figure 2A
Subject	LongPrep.60	LongPrep.30	LongPrep.0	ShortPrep.60	ShortPrep.30	ShortPrep.0
P1	2	10.6	2.3	33.85	4.4	-2.7
P2	0.5365	5.1049	-1.2683	24.8272	15.4016	1.7975
P3	3.1794	-0.1355	0.6688	18.7542	11.8018	-1.4077
P4	5.2892	5.13925	0.7957	51.0828	23.5054	-1.7649
P5	14.9	6.5	-0.7	29.0202	14.5554	-3.0941
P6	7.5	7.6	-2	56.2	26.1	0.4
P7	0.06485	9.216	0.8932	40.9	17.75	4.7
P8	10.9772	-3.54755	1.9481	54.45	15.75	2.7
P9	2.1286	2.08665	5.5275	13.5342	10.2599	5.6995
P10	-13.2335	3.0802	3.1221	25.95	13.15	3

## Sheet: Figure 2B
Subject	LongPrep.60	LongPrep.30	LongPrep.0	ShortPrep.60	ShortPrep.30	ShortPrep.0
P1	652	256	109	460.5	253	217
P2	554.5	426	497	245.5	202.5	194
P3	189	242.5	381	287	173	158
P4	450	374.5	376	131	115.5	122
P5	417.5	562.5	588	174	191	174
P6	372	368.5	493	115	81	-27
P7	457	461	447	174.5	167	67
P8	361.5	422	417	26.5	106	65
P9	457	495.5	495	169	160	158
P10	440.5	441	630	184.5	227	210

## Sheet: Figure 2C
Subject	LongPrep.60	LongPrep.30	LongPrep.0	ShortPrep.60	ShortPrep.30	ShortPrep.0
P1	96.695	101.97	142.532	85.2343	93.8798	77.455
P2	129.76	114.209	159.995	204.454	185.174	250.179
P3	119.162	135.837	209.942	104.353	140.555	136.122
P4	146.202	170.137	158.951	144.813	146.255	168.433
P5	159.046	177.213	175.051	165.318	168.034	169.582
P6	88.0231	107.537	136.019	87.161	100.558	97.8249
P7	95.9773	99.6268	106.559	124.429	122.389	121.485
P8	185.071	170.377	178.691	168.516	142.622	167.894
P9	77.2231	90.3441	105.202	100.24	135.01	174.743
P10	112.297	123.735	182.545	96.6852	108.879	140.261
