# Supplementary material for: Action history influences subsequent movement via two distinct processes
Source: eLife. 2017 Oct 23;6:e26713. doi: 10.7554/eLife.26713 (PMC5662285; doi:10.7554/eLife.26713)
Supplement: Figure 3—source data 1. [file elife-26713-fig3-data1.xlsx]

## Sheet: Figure 3A
Long Preparation	TGT position = 0º	Quantile	0.05	0.15	0.25	0.35	0.45	0.55	0.65	0.75	0.85	0.95
		P1	2.97	3.71	3.42	0.9	-0.41	0.21	2.29	-0.51	-0.48	0.8
		P2	-5.03	-3.87	0.79	5.46	11.77	18.63	21.2	10.88	0.56	-2.02
		P3	0.89	-2.26	-4.92	-5.18	1.29	5.78	7.08	-0.6	-2.41	-1.27
		P4	1.71	5.5	7.59	4.76	11.76	12.1	5.49	4.98	6.34	8.23
		P5	5.58	-1.43	-4.59	2.61	-1.66	-1.8	3.36	11.99	11.08	6.2
		P6	-5.43	-2.81	-7.93	-28.29	-16.71	-5.29	3.45	11.66	7.76	-0.59
		P7	-0.7	-1.4	-1.98	-2.01	-2.89	-5.77	-9.75	-3.1	-2.44	-4.52
		P8	-6.15	-2.4	-1.27	-6.71	-2.62	3.08	9.02	7.03	5.92	5.44
		P9	-2.34	2.23	2.54	-7.06	-1.42	-1.16	-6.61	-1.08	1.01	1.16
		P10	3.02	-7.5	-10.98	3.35	4.32	3.48	1.61	-3.17	-9.75	-15.69
	TGT position = 30º	Quantile	0.05	0.15	0.25	0.35	0.45	0.55	0.65	0.75	0.85	0.95
		P1	5.14	11.19	5.86	2.82	8.59	4.75	7.54	4.94	0.61	5.01
		P2	19.29	9.58	14.25	12.65	8.9	10.56	-9.02	-19.48	8.54	-1.32
		P3	4.84	5.41	4.91	1.66	10.08	19.39	-0.83	5.24	1.21	10.73
		P4	8.44	9.98	-3.1	8.71	-1.95	10.53	1.3	-8.06	-3.08	19.44
		P5	0.31	7.99	-4.67	3.85	3.86	-0.96	8.81	7.49	8.13	-30.53
		P6	3.05	12.19	-1.12	7.17	0	10.18	15.64	10.55	6.63	6.6
		P7	20.67	-8.25	29.06	18.93	-21.19	8.17	5.04	12.42	3.02	14.61
		P8	8.71	-3.64	-17.5	1.35	5.8	6.07	6.46	-10.9	-6.13	2.22
		P9	8.02	2.95	-1.72	11.77	8.94	14.48	1.5	1.52	15.44	22
		P10	-9.61	6.88	-10.46	2.01	2.32	11.57	7.7	-12.71	-5.94	-11.21
	TGT position = 60º	Quantile	0.05	0.15	0.25	0.35	0.45	0.55	0.65	0.75	0.85	0.95
		P1	4.03	5.66	7.21	0.24	0.55	5.34	2.21	11.16	6.79	7.33
		P2	28.88	28.67	2.08	9.7	-8.44	-10.82	-14.17	9.94	6.01	-7.53
		P3	-3.98	-4.93	-10.22	4.56	17.46	7.38	1.37	-1.29	-2.49	3.55
		P4	-6.58	-6.22	-2.8	-10.46	2.01	13.46	9.4	11.46	13.48	14.82
		P5	-18.49	-11.78	-16.63	-11.1	-7.53	-32.15	-7.67	-5.66	-17.23	-15.25
		P6	25.43	8.55	13.12	16.64	13.83	15.85	18.55	31.1	10.22	0.96
		P7	52.62	29.38	1.58	26.12	9.77	-6.15	-18.18	12.2	-23.17	3.54
		P8	0.7	26.31	21.81	6.49	3.12	8.07	14.16	-15.63	12.76	0.01
		P9	-9.71	-8.7	-5.87	6.38	-1.51	-0.53	5.33	2.41	16.05	19.9
		P10	2.48	20.56	12.8	12.86	7.67	21.81	10.43	10.94	13.83	7.82

## Sheet: Figure 3B
Short Preparation	TGT position = 0º	Quantile	0.05	0.15	0.25	0.35	0.45	0.55	0.65	0.75	0.85	0.95
		P1	-6.77	-3.45	-2.31	-6.72	-2.23	0.34	0.19	-1.38	-1.87	-1.76
		P2	9.87	4.84	-2.7	-6.06	-9.86	-14.56	-8.63	2.62	-3.47	-7.53
		P3	1.24	1.55	0.8	-2	0.26	2.48	4.12	4.18	4.24	4.29
		P4	6.57	6.05	6.85	10.27	7.39	10.91	19.69	7.1	2.65	2.7
		P5	13.9	3.19	-3.96	0.58	2.28	3.01	2.49	-4.23	-1.44	4.9
		P6	-3.09	1.79	2.48	-6.8	1.49	5.04	2.27	-3.63	-4.55	-3.1
		P7	0.58	0.58	0.58	0.55	0.53	0.5	0.47	0.45	0.45	0.45
		P8	7.71	7.88	8.13	-0.43	-5.59	-3.96	-3.47	-3.56	-2.27	-1.41
		P9	5.97	4.5	2.29	0.64	0.58	3.7	21.76	47.29	22.87	6.59
		P10	2.66	9.81	9.23	-8.77	1.72	3.75	-3.61	5.65	4.45	-1.05
	TGT position = 30º	Quantile	0.05	0.15	0.25	0.35	0.45	0.55	0.65	0.75	0.85	0.95
		P1	25.62	23.83	23.35	27.15	23.7	24.07	20.01	12.23	6.59	12.78
		P2	5.78	18.8	0.15	10.37	14.65	11.96	9.84	3.74	9.52	3.66
		P3	31.81	30.02	13.33	21.36	16.09	4.75	14.73	12.68	6.54	14.19
		P4	21.49	6.99	7.14	20.89	20.47	22.81	7.32	7.47	8.32	5.47
		P5	39.91	25.29	28.03	15.41	7.6	0.9	6.88	13.69	15.68	9.78
		P6	28.3	31.27	47.14	10.44	12.88	7.27	5.35	23.34	12.45	3.44
		P7	30.86	31.31	30.62	25.78	29.81	26.39	25.69	21.41	3.68	-7.41
		P8	25.03	21.67	8.7	19.81	7.8	-2.43	8.36	0.97	6.11	9.61
		P9	16.58	21.04	19.41	21.58	14.5	14.42	14.05	17.04	9.9	23.51
		P10	12.51	29.41	15.35	16.77	19.14	22.92	27.17	-27.5	-6.97	1.03
	TGT position = 60º	Quantile	0.05	0.15	0.25	0.35	0.45	0.55	0.65	0.75	0.85	0.95
		P1	63.12	53.59	53.27	58.11	44.22	21.98	39.82	30.86	46.39	26.97
		P2	61.88	44.33	48.79	73.69	36.87	29.73	8.87	15.42	-8.74	2.69
		P3	43.19	13.5	30.39	29	19.04	28.59	18.97	26.7	13.35	-13.54
		P4	46.03	27.79	-26.82	13.3	29.36	17	4.6	23.86	-3.26	13.98
		P5	51.35	43.93	26.1	31.14	46.79	32.04	-5.43	-11.57	-15.97	-1.56
		P6	85.03	55.36	37.52	30.61	62.3	5.62	23.27	28.91	18.49	26.42
		P7	66.59	56.6	60.12	50.61	50.58	13.37	-3.9	59.58	54.12	24.52
		P8	50.83	31.68	12.95	17.62	17.73	34.57	-4.09	-1.37	18.73	-14.39
		P9	58.53	65.41	49.93	15.71	40.74	43.76	44.06	-4.23	-2.38	-15.55
		P10	57.57	54.61	61.09	57.4	50.88	66.64	55.82	21.88	-17.5	40.57

## Sheet: Figure 3C
Long Preparation	TGT position = 0º	Quantile	0.05	0.15	0.25	0.35	0.45	0.55	0.65	0.75	0.85	0.95
		P1	154.456	156.937	152.217	133.338	171.739	167.695	122.997	158.794	181.768	194.192
		P2	138.353	139.186	142.535	145.867	181.265	227.335	257.232	238.596	219.96	215.31
		P3	203.198	166.463	134.067	127.439	151.298	191.728	236.514	152.755	139.55	159.991
		P4	107.397	105.627	102.608	98.2178	102.643	100.474	95.5282	149.337	175.4	183.781
		P5	132.818	160.165	179.304	170.212	187.286	173.89	135.837	199.415	225.113	228.792
		P6	77.6556	154.196	190.878	118.19	153.328	245.624	365.422	207.9	210.677	282.844
		P7	136.011	177.222	182.566	103.128	108.386	104.655	92.8039	177.326	203.458	198.513
		P8	239.498	183.035	155.115	206.286	192.526	198.495	223.118	168.823	179.044	215.223
		P9	73.0746	90.0102	100.231	90.0623	100.526	119.179	140.887	116.403	120.966	137.225
		P10	145.953	163.965	172.12	153.71	215.136	229.295	196.205	242.466	204.1	137.017
	TGT position = 30º	Quantile	0.05	0.15	0.25	0.35	0.45	0.55	0.65	0.75	0.85	0.95
		P1	127.387	148.747	153.519	170.021	154.473	184.926	161.796	199.571	180.588	164.832
		P2	56.7116	80.7442	99.1721	35.5247	101.966	55.0111	251.02	99.5018	278.714	115.414
		P3	91.8149	96.2917	104.586	139.932	104.065	161.345	129.018	159.21	114.824	110.087
		P4	63.8607	90.9299	73.4737	79.9287	55.8614	99.6233	159.262	69.8471	134.032	107.553
		P5	118.572	117.982	119.856	134.102	103.961	136.011	176.163	127.664	148.365	94.6779
		P6	102.382	183.503	142.327	275.174	144.27	259.488	229.677	210.746	207.241	171.548
		P7	57.8915	105.488	141.424	88.8476	84.4229	193.602	120.394	102.434	145.086	134.397
		P8	120.637	135.716	128.619	149.441	140.453	132.991	113.644	152.322	133.98	136.583
		P9	66.8279	74.5669	92.856	100.04	115.292	104.569	80.3972	111.666	113.835	155.931
		P10	149.632	152.981	165.509	162.629	172.45	220.498	206.443	276.181	154.126	120.862
	TGT position = 60º	Quantile	0.05	0.15	0.25	0.35	0.45	0.55	0.65	0.75	0.85	0.95
		P1	139.012	127.734	143.212	118.606	135.82	155.011	220.272	158.048	161.865	192.787
		P2	77.725	93.3245	151.957	54.6988	89.0559	43.2638	98.478	215.726	94.5391	124.35
		P3	145.155	147.116	125.634	116.663	137.711	103.25	131.742	153.12	122.927	116.351
		P4	73.1614	57.5272	54.3691	109.844	81.0045	108.577	55.4623	69.8818	197.923	103.18
		P5	98.721	105.783	116.49	120.862	112.846	103.059	160.685	84.0411	119.283	89.212
		P6	123.725	164.607	113.505	214.13	132.349	181.837	129.104	213.557	170.298	338.128
		P7	118.554	68.7192	72.2244	80.831	71.1659	109.045	149.476	66.7585	117.947	156.538
		P8	118.086	132.974	149.025	111.978	143.437	130.666	105.974	111.058	127.404	136.063
		P9	88.275	99.3283	100.387	96.0661	120.498	120.22	77.3779	102.486	75.2436	79.0958
		P10	179.235	158.464	127.647	283.434	194.053	192.44	171.999	106.408	191.277	233.043

## Sheet: Figure 3D
Short Preparation	TGT position = 0º	Quantile	0.05	0.15	0.25	0.35	0.45	0.55	0.65	0.75	0.85	0.95
		P1	144.877	158.325	169.101	168.476	175.365	173.526	164.451	182.237	175.417	159.332
		P2	78.9223	66.8626	48.7644	55.6531	62.9584	71.0618	86.1928	104.812	88.3965	77.4473
		P3	208.039	231.221	257.597	278.384	249.372	224.02	210.33	251.263	269.153	273.144
		P4	194.105	186.054	178.28	174.983	158.534	167.973	198.912	159.471	153.449	163.34
		P5	80.831	121.66	156.625	161.015	144.825	120.22	93.5154	127.959	143.194	146.786
		P6	123.587	175.157	191.745	120.047	162.993	215.622	260.494	193.498	168.563	167.331
		P7	130.996	130.996	130.996	124.367	117.721	111.093	104.465	97.8187	97.8187	97.8187
		P8	173.196	158.36	136.115	146.561	145.415	121.123	109.323	103.788	117.808	127.161
		P9	121.487	128.931	140.106	115.552	100.005	102.4	130.198	170.697	167.418	165.231
		P10	146.942	158.464	155.983	122.615	156.885	175.573	173.404	170.715	158.499	144.721
	TGT position = 30º	Quantile	0.05	0.15	0.25	0.35	0.45	0.55	0.65	0.75	0.85	0.95
		P1	120.394	153.085	139.429	151.211	159.384	152.46	139.967	112.186	175.348	116.247
		P2	170.159	125.183	81.9762	96.7949	102.4	105.506	73.5084	79.3561	76.4236	102.278
		P3	160.477	224.871	236.496	161.327	155.775	153.831	210.434	178.332	189.733	234.605
		P4	158.534	141.355	161.136	121.296	113.436	140.678	93.5848	136.358	163.583	155.289
		P5	73.5778	83.7288	206.391	155.74	90.0449	106.824	84.9087	136.184	117.444	135.577
		P6	175.244	122.06	196.136	129.59	221.886	183.156	161.171	137.59	217.583	182.826
		P7	95.2159	106.252	69.7257	91.1728	83.0868	134.622	98.8771	157.944	180.154	105.731
		P8	176.684	117.756	105.783	147.55	175.452	147.654	147.723	102.764	117.583	103.562
		P9	159.332	194.747	184.215	121.869	120.116	99.2589	141.546	134.709	114.303	95.2506
		P10	162.299	140.592	137.78	105.02	180.727	145.52	120.185	151.957	197.61	102.209
	TGT position = 60º	Quantile	0.05	0.15	0.25	0.35	0.45	0.55	0.65	0.75	0.85	0.95
		P1	126.762	132.696	163.895	184.839	133.911	157.944	133.668	119.838	122.944	164.936
		P2	88.57	68.7539	65.1274	44.8775	51.4192	86.0019	72.1202	101.515	97.489	113.054
		P3	238.822	205.644	176.649	154.022	185.967	205.107	204.256	216.958	165.388	200.942
		P4	78.9223	74.0116	103.493	115.275	87.5462	104.222	104.898	67.6608	120.949	146.127
		P5	123.413	77.2912	108.698	75.9724	92.9601	124.09	111.267	97.2461	75.9377	103.337
		P6	155.306	179.339	238.718	154.126	129.712	120.272	182.063	159.592	235.473	213.158
		P7	76.2327	85.5161	74.7751	55.7746	71.2874	79.7899	72.3111	87.4421	99.2242	86.2275
		P8	128.532	93.6542	142.882	128.792	129.885	87.1818	93.793	152.443	115.188	99.5539
		P9	92.9774	149.944	113.436	167.99	118.086	121.591	148.07	99.2242	171.912	148.66
		P10	137.902	165.301	132.558	170.09	179.356	202.243	133.356	131.707	191.798	161.674
