# Supplementary material for: Action history influences subsequent movement via two distinct processes
Source: eLife. 2017 Oct 23;6:e26713. doi: 10.7554/eLife.26713 (PMC5662285; doi:10.7554/eLife.26713)
Supplement: Figure 4—source data 1. [file elife-26713-fig4-data1.xlsx]

## Sheet: Figure 4A
Subject	LongPrep.90	LongPrep.60	LongPrep.30	LongPrep.0	ShortPrep.90	ShortPrep.60	ShortPrep.30	ShortPrep.0
P1	5.21735	8.1565	2.0773	1.3584	47.05	20.95	4.9	3.4
P2	9.0513	10.4286	4.0938	2.5543	23.951	6.14625	8.9648	-2.1409
P3	-4	1.3	2.65	-0.8	30.121	37.9808	11.8653	-6.241
P4	6.1	3.5	5.4	1.9	21.8	5.7	7.15	2.7
P5	0.186	1.99545	2.2475	3.069	3.47325	4.49505	1.21025	6.883
P6	0.15	5.15	9.6	1.9	11.6016	3.45355	5.22205	1.4101
P7	3.04125	10.4407	2.76005	0.9769	5.61605	2.6358	11.8402	1.606
P8	7.15	0.8	3.1	-1.8	0.30755	2.52065	3.24735	0.0769
P9	0.1	-3.65	-0.95	6.1	0.35	2.1	2.45	2.9
P10	3.7611	8.9278	4.32745	2.4782	10.3112	6.58165	2.5187	5.2193

## Sheet: Figure 4B
Subject	LongPrep.90	LongPrep.60	LongPrep.30	LongPrep.0	ShortPrep.90	ShortPrep.60	ShortPrep.30	ShortPrep.0
P1	880.5	885.5	883.5	978	497	497.5	488	505
P2	680	761	717.5	602	530.5	448.5	478.5	439
P3	934	883.5	858	844	460	455	449	447
P4	726.5	778.5	703	761	578	552.5	595	560
P5	805.5	835.5	819.5	820	705	727	670	629
P6	763	828.5	829	878	542	500	426.5	419
P7	807	789.5	796	829	497	432.5	407	409
P8	843.5	817.5	763.5	807	469.5	463.5	382.5	407
P9	738.5	759	758	792	465	439.5	381	389
P10	824.5	810.5	807.5	791	480	436	401	372

## Sheet: Figure 4C
Subject	LongPrep.90	LongPrep.60	LongPrep.30	LongPrep.0	ShortPrep.90	ShortPrep.60	ShortPrep.30	ShortPrep.0
P1	280.119	250.444	301.161	323.205	281.935	269.833	287.862	394.307
P2	73.0628	99.5129	110.538	102.095	125.501	125.42	143.552	162.844
P3	246.7	237.741	178.491	240.778	237.688	198.078	215.201	241.231
P4	392.988	379.231	527.307	531.707	410.84	492.283	638.291	539.092
P5	452.401	464.284	561.345	572.769	434.036	497.947	678.756	640.623
P6	143.709	159.707	167.175	245.401	142.603	158.005	178.866	290.361
P7	149.355	173.762	184.408	178.241	114.112	122.015	141.753	210.999
P8	87.254	122.705	160.156	149.007	96.8227	112.42	155.763	170.107
P9	106.668	104.963	112.213	121.885	115.731	115.098	100.318	148.393
P10	124.2	137.175	193.279	212.696	132.7	157.062	202.572	294.053
