# Supplementary material for: Action history influences subsequent movement via two distinct processes
Source: eLife. 2017 Oct 23;6:e26713. doi: 10.7554/eLife.26713 (PMC5662285; doi:10.7554/eLife.26713)
Supplement: Figure 5—source data 1. [file elife-26713-fig5-data1.xlsx]

## Sheet: Figure 5A
Long Preparation	TGT position = 0º	Quantile	0.05	0.15	0.25	0.35	0.45	0.55	0.65	0.75	0.85	0.95
		P1	1.01	-0.34	-0.46	2.28	6.16	6.28	2.87	3.7	2.06	-0.31
		P2	5.61	4.21	4.23	7.51	6.97	4.46	0.71	2.45	2.1	0.92
		P3	-22.57	-8.19	1.25	-5.28	2.75	2.05	-7.45	-3.27	-0.79	0.42
		P4	-1.67	0.99	1.59	-2.83	-0.03	1.41	0.7	-3.16	-0.58	4.27
		P5	3.27	-2.46	-4.45	3.11	7.16	6.56	1.75	-0.79	-0.46	1.06
		P6	-3.76	-4.79	-3.78	1.43	1.51	4.32	9.18	0.06	-1.02	1.65
		P7	4.16	2.27	-0.17	-2.68	-2.75	-2.03	-0.4	5.31	3.56	-1.08
		P8	12.27	6.61	-1.55	-11.4	-6.44	0.31	7.06	5.55	3.91	2.55
		P9	-2.1	-0.67	1.34	3.71	1.43	0.73	1.91	2.37	4.89	7.77
		P10	-0.18	-0.33	1.81	8.13	6.95	7.64	10.36	7.81	2.54	-2.79
	TGT position = 30º	Quantile	0.05	0.15	0.25	0.35	0.45	0.55	0.65	0.75	0.85	0.95
		P1	6.77	1.64	4.73	3.28	4.6	6.85	-5.12	3.93	9.8	1.21
		P2	0.74	-3.12	-1.51	0.31	0.61	8.87	9.41	13.12	3.93	12.31
		P3	6.12	5.37	-8.05	-10.59	5.39	-1.15	10.07	4.34	5.46	1.51
		P4	2.62	2.17	-2.55	-0.76	-1.47	3.56	6.34	17.52	6.37	12.26
		P5	13.95	5.44	20.56	16.78	9.01	1.27	-3.69	8.27	14.56	15.15
		P6	4.2	5.89	9.55	2.24	1.93	-4.7	2.48	-9.88	-2.09	6.48
		P7	1.26	-4.41	7.5	3.37	1.87	1.99	4.95	2.67	5.89	-0.81
		P8	-4.29	1.88	10.33	1.91	0.27	8.58	6.45	16.38	6.2	1.71
		P9	-6.02	11.17	-6.37	4.83	1.42	13.12	5.87	15.62	8.04	11.4
		P10	1.96	-3.72	0.39	1.62	-0.33	4.34	4.62	5.1	-7.77	-2.31
	TGT position = 60º	Quantile	0.05	0.15	0.25	0.35	0.45	0.55	0.65	0.75	0.85	0.95
		P1	-7.82	-3.96	16.08	13.6	4.72	16.68	9.47	8.41	7.03	-0.65
		P2	-1.35	6.76	-3.37	-4.36	1.78	-0.21	3.22	-2.84	4.68	5.51
		P3	12.66	4.92	0.41	19.92	-2.05	-16.99	-6.11	1.19	3.21	6.99
		P4	4.73	0.16	11.3	5.95	13.24	8.65	17.21	24.56	18.27	12.17
		P5	16.99	3.28	-3.59	0.47	-7.42	14.01	14.87	13.6	9.02	1.07
		P6	7.97	12.57	9.23	14.16	11.14	-4.49	2.69	3.26	7.21	0.43
		P7	-1.2	3.94	-21.66	1.74	4	6.31	-1.92	-8.57	1.53	-4.79
		P8	2.01	28.87	-6.54	24.95	3.44	4.16	9.46	-27.36	12.56	16.62
		P9	-4.83	3.54	14.32	3.34	1.78	4.32	8.25	29.45	0.28	-6.19
		P10	-4.33	11.17	-10.56	-6.86	2.64	-6.78	17.38	-16.84	2.19	-17.89
	TGT position = 90º	Quantile	0.05	0.15	0.25	0.35	0.45	0.55	0.65	0.75	0.85	0.95
		P1	-12.59	7.88	5.63	-22.87	5.44	12.05	8.68	-9.76	1.8	0.52
		P2	9.28	1.81	-2.41	1.65	-8.24	0.21	2.01	-14.39	-3.29	8.38
		P3	17.99	12.96	4.91	8.23	9.81	7.38	12.93	-6.06	-13.4	-6.63
		P4	3.4	2.06	5.33	10.8	6.97	4.18	-5.16	-4.54	5.03	-1.99
		P5	-4.04	-1.16	-19.22	0.75	11.47	3.14	-1.99	-1.08	-3.52	20.41
		P6	14.65	0.31	7.84	-3.47	1.06	11.27	7.95	-4.03	1.91	-1
		P7	0.72	0.92	-8.95	3.97	-6.42	-5.54	-14.58	-6.43	-4.96	-1.84
		P8	15.37	8.18	0.38	-7.43	15.19	10.22	-9.42	17.06	16.24	16.33
		P9	21.15	10.97	3.18	2.66	-3.44	0.59	2.77	-9.34	15.72	21.01
		P10	-4.41	-4.31	6.55	3.42	0.81	4.86	3.2	-3.3	-8.34	3.85

## Sheet: Figure 5B
Short Preparation	TGT position = 0º	Quantile	0.05	0.15	0.25	0.35	0.45	0.55	0.65	0.75	0.85	0.95
		P1	5.22	5.52	5.25	3.84	6.71	5.85	1.55	5.35	5.46	3.92
		P2	11.69	9.92	7.22	3.73	1.41	0.05	-0.04	5.06	8.58	10.66
		P3	-1.11	-9.27	-10.31	5.47	2.36	2.33	6.23	2.39	-0.17	-1.63
		P4	3.27	2.35	1.39	0.78	2.94	1.39	-3.35	1.56	1.4	-0.95
		P5	5.17	3.1	1.03	-0.03	1.86	3.83	5.21	1.22	-0.31	-0.43
		P6	-3.7	2.29	4.89	-1.58	1.47	4.57	6.78	6.25	4.06	1.63
		P7	-6.48	-6.35	-6.94	-8.9	-8.89	-6.72	-2.3	5.08	5.61	3.05
		P8	23.13	9.23	-3.78	-8.36	-3.68	-3.37	-7.62	-5.06	-2.63	-0.76
		P9	3.5	4.15	3.01	-1.69	-14.8	-13.13	2.91	5.42	-1.15	-10.27
		P10	-4.37	3.48	7.46	0.64	1.95	2.84	2.84	4.9	5.56	5.47
	TGT position = 30º	Quantile	0.05	0.15	0.25	0.35	0.45	0.55	0.65	0.75	0.85	0.95
		P1	6.31	4.91	7	2.59	0.49	-7.07	-1.25	-9.21	-0.51	6.4
		P2	0.68	-0.35	0.1	-2.25	8.54	4.15	-4.19	-0.49	7.67	6.06
		P3	12.44	7.12	2.83	1.1	6.71	4.93	3.87	10.22	3.55	2.24
		P4	15.13	4.05	27.06	17.11	9.39	33.76	11.39	13.64	11.15	11
		P5	9.89	2.83	19.47	15.34	-6.53	2.22	5.41	1.81	5.75	9.93
		P6	28.69	9.96	9.22	1.22	9.48	3.68	-2.01	4.17	7.87	-1.57
		P7	38.48	24.41	17.72	11.61	18.1	11.78	6.65	9.75	8.04	-1.49
		P8	19.01	11.42	4.52	20.63	7.5	15.81	7.25	4.8	14.62	-6.98
		P9	23.03	7.92	25.19	11.68	11.32	11.06	1.57	5.63	-5.66	-5.71
		P10	13.33	9.44	9.04	5.82	-0.99	-1.75	3.52	2.16	-12.02	-7.88
	TGT position = 60º	Quantile	0.05	0.15	0.25	0.35	0.45	0.55	0.65	0.75	0.85	0.95
		P1	5.23	-0.66	2.03	25.54	12.17	8.22	9.41	18.81	-0.87	8.82
		P2	3.01	8.15	4.23	6.16	12.17	6.74	-4.42	5.03	6.21	-0.27
		P3	2.38	7.34	-13.8	4.53	4.95	10.12	-4.48	-26.13	4.85	1.42
		P4	7.99	8.04	-13.55	-13.2	-4.16	26.44	27.39	-31.15	-2.44	14.19
		P5	6.27	8	4.64	-4.66	8.53	17.11	2.1	-2.9	0.81	2.45
		P6	47.76	37.22	32.36	23.04	25.57	14.72	17.76	3.69	0.03	2.46
		P7	57.09	45	44.74	53.38	-2.85	16.56	41.93	11.27	-8.59	-8.2
		P8	55.37	20.93	14.87	-5.6	4.29	19.6	8.71	-14.47	-8.16	-6.84
		P9	28.74	32.85	2.3	6.43	-5.97	10.22	7.77	6.37	2.32	2.63
		P10	57.61	-11.42	6.78	-4.4	11.8	-14.32	-0.35	10.37	13.68	2.99
	TGT position = 90º	Quantile	0.05	0.15	0.25	0.35	0.45	0.55	0.65	0.75	0.85	0.95
		P1	1.57	18.59	-33.15	32.45	-5.84	-22.16	20.31	12.35	15.81	23.74
		P2	0.59	-2.74	-10.94	13.17	2.26	7.21	10.67	9.7	7.7	-4.64
		P3	9.56	5.97	-0.93	6.86	3.37	0.64	2.51	-8.79	-5.56	20.41
		P4	24.34	19.37	7.14	-9.07	33.05	21.42	16.84	-4.94	-14.29	-4.18
		P5	18.21	14.61	9.11	15.11	14.88	-4.11	2.54	0.56	21.67	8.31
		P6	69.29	80.56	98.75	39.91	58.48	48.16	-1.89	52.93	22.03	22.23
		P7	88.55	76.54	82.86	47.17	2.51	76.96	31.49	17.3	-4.58	-19.04
		P8	71.3	64.74	54.19	24.02	20.86	23.57	20.42	-0.62	-13.13	-6.55
		P9	53.98	58.27	30.8	12.09	40.73	8.05	19.46	-2.09	-0.44	22.63
		P10	6.16	0.87	-1.54	11.69	-4.34	7.78	0.13	14.12	0.61	-2.46

## Sheet: Figure 5C
Long Preparation	TGT position = 0º	Quantile	0.05	0.15	0.25	0.35	0.45	0.55	0.65	0.75	0.85	0.95
		P1	195.233	204.846	208.941	198.426	279.235	295.945	244.218	227.248	215.813	209.254
		P2	456.243	527.977	611.648	681.542	612.585	593.967	624.749	504.412	500.716	548.73
		P3	143.038	126.085	137.416	207.97	206.304	190.461	166.828	153.692	141.581	132.505
		P4	171.895	181.907	187.147	178.836	205.488	219.301	215.153	179.773	167.383	167.713
		P5	349.163	228.272	167.296	273.474	256.59	244.114	248.903	297.853	272.658	220.463
		P6	286.384	282.358	302.382	367.678	351.506	328.185	306.616	318.832	370.628	428.601
		P7	215.396	177.465	170.003	236.063	302.382	294.418	221.07	263.878	277.135	274.671
		P8	131.534	103.562	85.3425	98.4433	120.671	121.626	101.723	96.604	108.56	125.408
		P9	519.04	595.06	644.982	610.59	483.121	516.142	693.967	574.411	524.194	515.015
		P10	154.317	135.82	120.984	121.817	135.646	129.365	103.371	95.5455	125.322	165.11
	TGT position = 30º	Quantile	0.05	0.15	0.25	0.35	0.45	0.55	0.65	0.75	0.85	0.95
		P1	214.824	210.191	195.042	200.179	140.904	179.165	156.087	183.902	215.188	250.482
		P2	201.601	529.764	626.189	562.559	670.749	532.488	517.149	551.732	693.515	536.531
		P3	121.192	135.004	173.769	161.969	175.591	124.159	164.989	158.586	162.75	186.453
		P4	186.314	201.358	147.116	136.496	197.073	168.233	212.88	131.638	177.742	194.105
		P5	114.494	259.332	259.488	187.321	137.659	132.505	129.642	255.133	263.965	209.635
		P6	283.486	285.915	274.775	412.88	276.007	335.837	261.674	220.394	345.849	381.612
		P7	162.316	215.882	175.14	175.313	140.14	140.244	160.338	299.155	226.432	230.25
		P8	97.3675	110.156	95.8232	105.627	143.316	119.318	105.714	129.035	121.712	98.3566
		P9	333.79	458.551	744.756	366.359	567.661	568.789	603.042	493.082	551.784	743.871
		P10	102.469	108.525	99.1721	100.213	212.238	122.615	142.518	103.545	143.212	92.4222
	TGT position = 60º	Quantile	0.05	0.15	0.25	0.35	0.45	0.55	0.65	0.75	0.85	0.95
		P1	142.57	142.691	140.331	151.558	140.834	137.416	139.498	142.066	135.629	111.804
		P2	352.304	383.677	475.799	443.437	469.934	531.048	579.651	437.763	500.873	471.513
		P3	74.0116	78.072	141.598	160.408	120.342	114.459	81.3168	136.722	149.753	125.877
		P4	137.937	147.55	163.878	187.945	192.006	133.737	174.255	127.734	207.241	196.361
		P5	112.62	139.533	413.904	171.183	208.178	224.107	312.689	128.514	138.11	145.815
		P6	277.239	235.004	228.15	226.345	265.579	273.543	253.571	237.572	300.682	185.256
		P7	335.334	227.977	190.652	203.371	248.643	234.414	255.532	220.758	228.029	226.068
		P8	96.1355	91.6934	107.293	78.2108	96.257	98.2525	74.7751	122.094	130.978	129.209
		P9	334.779	385.898	496.083	343.975	300.057	319.977	445.225	373.179	348.695	404.43
		P10	94.0186	91.1728	150.951	122.84	86.6439	119.578	110.312	140.175	77.1871	93.5154
	TGT position = 90º	Quantile	0.05	0.15	0.25	0.35	0.45	0.55	0.65	0.75	0.85	0.95
		P1	143.351	133.859	123.413	97.7493	121.678	130.51	134.969	99.9356	131.412	115.639
		P2	426.554	456.937	395.997	564.902	469.76	441.216	446.179	489.455	510.642	430.614
		P3	91.1902	94.7474	104.638	146.578	75.261	69.9512	80.3798	90.0796	86.7133	68.4763
		P4	156.035	157.545	110.989	139.689	123.222	146.734	162.212	224.749	170.749	152.009
		P5	149.424	259.245	115.83	101.081	193.498	133.737	183.816	108.716	159.332	177.152
		P6	181.126	240.418	187.668	341.667	330.961	329.035	286.922	322.06	243.888	281.976
		P7	273.855	247.949	230.336	236.444	300.994	261.345	204.499	295.112	249.892	222.129
		P8	59.4532	68.2854	84.2667	71.9988	72.2764	69.7604	67.8516	105.02	89.0212	84.1799
		P9	253.415	308.612	196.153	339.481	352.322	394.817	411.562	418.016	460.998	387.564
		P10	94.1747	103.822	58.1171	108.525	109.08	82.8265	116.125	72.9358	107.501	126.398

## Sheet: Figure 5D
Short Preparation	TGT position = 0º	Quantile	0.05	0.15	0.25	0.35	0.45	0.55	0.65	0.75	0.85	0.95
		P1	279.564	294.071	303.354	296.118	295.216	294.661	292.283	267.557	238.926	214.737
		P2	615.917	642.795	658.742	641.824	625.287	636.184	666.516	593.377	651.159	753.71
		P3	158.377	151.714	161.136	202.729	173.873	161.414	173.925	227.3	254.456	264.347
		P4	229.07	184.544	167.886	223.257	220.012	203.753	181.386	190.409	201.445	211.006
		P5	177.864	254.508	342.934	414.963	335.768	266.793	233.737	383.573	317.947	172.328
		P6	427.699	380.345	339.637	334.206	373.127	396.378	397.177	354.057	429.573	540.678
		P7	236.254	239.498	245.172	253.658	245.797	218.155	177.864	213.817	258.152	296.656
		P8	153.658	149.788	150.673	162.039	168.962	170.264	168.841	201.098	184.943	151.142
		P9	372.103	649.493	792.11	555.965	465.231	524.211	694.522	511.527	649.632	898.287
		P10	135.039	152.304	161.935	149.302	157.631	146.942	121.903	178.697	174.289	144.131
	TGT position = 30º	Quantile	0.05	0.15	0.25	0.35	0.45	0.55	0.65	0.75	0.85	0.95
		P1	224.211	184.596	207.432	208.82	205.644	212.256	186.609	232.124	173.994	143.264
		P2	746.96	589.299	481.82	731.516	650.274	397.576	704.95	941.858	881.404	581.56
		P3	162.108	141.581	108.577	166.915	168.563	148.834	184.301	126.953	176.007	153.276
		P4	203.58	130.094	138.978	148.122	183.833	66.8279	104.985	162.091	156.07	209.098
		P5	191.693	206.443	196.274	141.65	284.926	300.56	183.278	140.956	169.552	155.098
		P6	258.638	343.94	334.64	288.917	242.101	252.617	288.986	231.846	280.883	321.14
		P7	164.173	226.519	156.92	174.393	259.557	246.734	279.391	234.744	227.56	143.385
		P8	151.974	116.958	140.019	145.277	128.376	136.687	123.118	168.91	161.865	160.633
		P9	664.173	751.61	480.987	513.748	787.286	767.279	486.696	541.841	692.596	606.876
		P10	95.962	93.4286	82.9306	114.459	121.834	138.648	99.953	104.517	83.5032	104.898
	TGT position = 60º	Quantile	0.05	0.15	0.25	0.35	0.45	0.55	0.65	0.75	0.85	0.95
		P1	134.761	170.715	168.511	193.602	191.763	130.666	156.26	129.33	131.326	157.492
		P2	430.302	508.265	515.639	868.98	506.876	515.934	495.962	551.419	473.456	445.988
		P3	85.0649	119.717	71.3047	101.254	92.0404	126.554	98.2178	129.434	170.992	112.134
		P4	119.283	111.284	109.028	139.429	140.106	101.758	113.557	133.842	107.675	99.2242
		P5	371.096	168.945	253.484	138.214	241.147	171.843	178.402	211.457	121.73	146.63
		P6	273.994	190.93	344.34	252.981	340.071	223.17	228.115	317.322	325.929	264.971
		P7	167.088	194.591	267.591	146.335	258.134	230.215	150.742	259.193	262.715	209.514
		P8	118.797	141.685	155.237	131.412	140.071	104.013	108.75	107.449	124.489	192.682
		P9	499.12	471.86	621.973	576.372	474.879	510.399	348.261	611.579	444.912	470.923
		P10	63.2186	139.672	117.045	124.957	103.597	112.169	119.63	205.697	101.862	94.1747
	TGT position = 90º	Quantile	0.05	0.15	0.25	0.35	0.45	0.55	0.65	0.75	0.85	0.95
		P1	161.813	178.211	129.885	139.238	111.423	117.86	204.222	135.525	131.464	130.389
		P2	411.562	367.487	447.446	443.645	526.918	335.664	449.979	829.746	634.449	537.902
		P3	56.7463	80.3451	73.7513	64.0342	108.75	113.331	149.007	146.613	122.684	128.775
		P4	101.671	88.223	183.052	107.918	121.903	123.899	130.701	71.3741	120.168	174.81
		P5	146.942	274.758	151.818	122.806	151.09	162.125	120.133	182.271	139.342	141.251
		P6	221.331	270.107	112.776	255.306	184.145	333.599	262.611	284.423	372.294	281.109
		P7	181.803	193.793	159.176	228.619	256.902	239.516	215.518	319.006	298.617	311.267
		P8	116.975	116.142	107.414	114.303	126.12	135.247	144.617	131.256	180.727	141.789
		P9	460.772	464.26	317.791	401.515	376.51	371.981	446.613	532.349	382.393	561.952
		P10	100.63	140.921	127.716	107.397	151.246	112.603	121.539	83.4859	107.067	111.995
