# Supplementary material for: Action history influences subsequent movement via two distinct processes
Source: eLife. 2017 Oct 23;6:e26713. doi: 10.7554/eLife.26713 (PMC5662285; doi:10.7554/eLife.26713)
Supplement: Figure 7—source data 1. [file elife-26713-fig7-data1.xlsx]

## Sheet: Figure 7A
Subject	0º	30º	60º	90º	120º	150º	180º	0ºearly	30ºearly	60ºearly	90ºearly	120ºearly	150ºearly	180ºearly	0ºlate	30ºlate	60ºlate	90ºlate	120ºlate	150ºlate	180ºlate
P1	0	3.4505	2.119	8.8255	5.7815	-6.538	2.175	0	3.8	0.75	11.188	12.625	-2.825	12.175	0	2.45	0.838	9.438	6.413	-9.625	-19.075
P2	0	10.942	14.6905	9.14	3.9815	3.6575	1.319	0	7.644	12.121	9.651	1.066	2.549	-2.006	0	12.695	15.34	6.447	2.975	2.601	0.846
P3	0	4.105	4.0225	0.3345	0.9175	2.7475	-3.5745	0	2.555	5.173	0.899	0.955	4.76	-4.047	0	5.044	2.076	1.868	4.628	1.271	-1.198
P4	0	1.689	2.557	2.0375	1.407	-0.299	-0.5305	0	2.112	6.414	1.719	1.84	-0.612	0.562	0	2.067	-0.925	1.267	0.671	-1.619	-6.275
P5	0	-1.6355	1.4495	-0.422	0.899	-1.276	1.264	0	-4.416	-0.562	-1.196	4.097	-3.519	-8.937	0	1.847	2.972	0.409	-1.241	2.127	2.181
P6	0	0.725	5.369	9.594	9.288	1.675	-6.7375	0	3.888	2.55	11.563	7.863	4.613	-9.45	0	2.713	8.75	9.025	10.963	-1.475	-6.375
P7	0	2.789	16.01	2.169	3.716	-1.993	-1.752	0	1.022	10.857	3.607	2.729	-3.494	-9.633	0	4.622	24.246	1.124	4.917	-1.086	-5.519
P8	0	12.3325	3.909	3.822	2.4425	1.447	-0.4175	0	6.46	0.966	3.703	1.53	-0.093	2.454	0	8.946	5.426	4.456	0.089	-2.502	-3.899
P9	0	4.8625	1.1875	6.419	0.975	-2.1685	-12.1875	0	14.075	3.725	9.325	2.3	-4.125	-14.425	0	1.75	-2.038	5.788	-0.6	-0.275	-12.3
P10	0	5.094	3.794	4.469	5.225	-0.2815	-4.325	0	6.688	4.013	1.513	-1.738	-1.338	-11.45	0	5.238	-0.488	3.588	13.388	0.688	3.325
P11	0	9.1065	12.244	6.95	-0.2875	7.3005	-2.05	0	7.238	5.55	-0.675	3.438	4.65	17.4	0	10.538	14.513	17.95	-1.325	11.738	6.8
P12	0	4.1	6.919	5.1875	3.588	-0.8435	-2.875	0	8.163	4.213	5.35	-5.85	-5.4	-0.3	0	3.138	9.3	5.663	10.575	10.675	-5.55
P13	0	7.1295	6.446	4.7935	7.8455	7.8585	-9.74	0	4.621	5.533	1.137	1.263	1.117	2.556	0	7.823	9.562	12.071	11.033	13.388	-5.88
P14	0	3.7005	7.5705	4.693	6.127	1.7725	2.5645	0	4.666	2.769	2.372	11.239	0.675	6.651	0	4.243	12.46	7.831	0.583	4.7	0.036
P15	0	6.883	3.123	4.0625	-0.3845	3.8605	-27.9545	0	4.744	4.379	6.648	2.876	7.403	-50.278	0	9.69	1.906	2.779	0.561	-1.985	1.546
P16	0	5.73316	7.32452	0.358262	11.1008	9.02056	14.9857	0	7.60053	9.10025	6.35034	10.3889	14.4204	27.8259	0	8.27383	10.0226	1.56005	8.68476	5.4091	10.6087
P17	0	7.17036	9.90589	6.92099	-3.10906	0.459394	-6.45614	0	1.92561	4.06393	6.61883	-2.97987	-0.9526	-1.00778	0	9.79041	16.7755	6.81832	-5.65306	0.984762	-12.3749
	0	14.5612	3.51043	3.93513	20.1314	0.994112	-6.75771	0	3.86749	-1.15765	3.19179	18.0267	1.99979	-4.27535	0	19.0214	7.15796	5.00316	20.987	-0.611	-3.09598

## Sheet: Figure 7B
Subject	0º	30º	60º	90º	120º	150º	180º	0ºearly	30ºearly	60ºearly	90ºearly	120ºearly	150ºearly	180ºearly	0ºlate	30ºlate	60ºlate	90ºlate	120ºlate	150ºlate	180ºlate
P1	988.75	1000.03	988.156	1011.47	1034.03	830.281	1003.81	972.75	1010.12	976.813	1030.62	1023.31	1001.56	1049.25	1008	1040.06	1001.31	971.188	1045.31	1040.83	1005.38
P2	971.5	989.25	968.438	939.906	983.062	977.375	974.75	969.375	966.313	982.5	944.813	973.75	974.313	967.875	975	1000.12	951.813	962	968.563	984.75	997.375
P3	995.938	1039.5	1024.94	985.719	1020.34	1004.03	1001.25	1009.5	1052.12	1025.69	1027	1016.75	996.75	1023.38	1015.88	1000.5	1032.38	690.125	993.438	1001.12	1006.38
P4	935.062	1017.16	1042.72	1032.69	1060.16	1072.22	1120.94	907.625	1032.62	1076.69	1041	1079.31	1078.5	1451.25	931.75	1016.88	1025.19	1015.44	1047.62	1046.38	964.125
P5	1018.38	986.75	958.5	981.312	986.875	1006.31	986.5	1066.75	978	1005.44	1002.69	994.188	1011.69	926.875	998.75	972.75	952.125	975.25	986.938	965.438	975
P6	906.812	1002.84	987.312	946.438	1004.09	984.125	990.188	814.125	1006.81	942.5	939.063	1020.19	1001.06	1035.62	1042.62	1024.69	978.313	999.688	984.438	993.063	971.375
P7	927.75	979.031	991.062	1012.5	1132.19	1069.97	954.812	943.75	962.313	1034.62	1011.44	1085.75	1122.19	1028.75	926.5	986.5	934.313	997.063	1217	1078.5	1013
P8	972	977.062	965.406	980.969	977.531	968.5	975.875	989.75	981.938	956.125	996.563	971.188	961.25	975.375	987.875	980.688	965.125	985.063	933.188	961.563	964.25
P9	995.5	995.125	991.656	1004.69	999.094	1042.62	1071.25	988.875	988.438	1004.44	1011.88	968.75	1038.56	1058.75	984.125	990.5	980.438	974.438	989.313	1030.44	1085.62
P10	993.625	982.906	963.969	977.531	975	988.25	978.688	1035.12	972.5	956.625	960.313	976.75	988.125	958.875	974.875	980.063	966.375	970.313	954.938	1004.94	996.5
P11	979.688	985.188	1008.72	968.344	980.469	989.438	991.188	959.375	982.625	975.875	989.438	977.25	982.688	991	972.125	969.25	978.313	986.313	988.063	988.625	1006.5
P12	987.562	1013.16	1043.28	1038.22	1048.69	1032.22	745.062	949.5	1024.31	1054.31	1012.62	1052.44	1021.56	447	938.875	1022.5	1022.94	1028.94	1033.81	1047.12	1033.5
P13	991	1046	1053.81	1054.53	1056.47	1065.22	1063.31	982.5	999.188	999.313	1058.94	1058.25	1014.56	1044.62	978.25	1063.56	1033	1042.69	1074.81	1067.94	1075.25
P14	1025.06	981.406	1038.91	960.969	1023	1003.09	1036	1029.38	1001.88	984.938	969.563	1091.44	948.313	1049.75	1159.75	970.563	1015.62	985.625	929	977.313	1015
P15	1053.31	1017.22	1003.97	998.062	1010.38	1006.56	1021.12	1070.38	1032.25	1020.31	981.188	1008.5	994.938	986	1049.62	1016.75	1003.94	1008.62	1009.81	1003.12	1037.88
P16	1023.12	1048.19	968.719	1026.03	975.188	1054.66	939.812	1031.38	1052	1010.19	990.812	808.375	1046.19	1025.38	997.25	1011.44	986.625	1015.75	1040.56	1054.88	938.125
P17	1071.25	1012.84	1020.44	1008.69	1057.53	1040.12	1041.88	1049.62	1005.5	996	1011.69	1013.06	1023.75	1060.88	1080.5	1060.5	1052.06	1016.69	1086.69	1026.25	1046.75
	1022.31	1044	1015.47	1010.06	1040.72	1056.53	1044.81	1110.38	1068.38	1081.31	1081.75	1108.31	1010.81	1066.75	982.125	1112.69	1006.31	990.062	1051.94	1005.38	1063.38

## Sheet: Figure 7C
Subject	0º	30º	60º	90º	120º	150º	180º	0ºearly	30ºearly	60ºearly	90ºearly	120ºearly	150ºearly	180ºearly	0ºlate	30ºlate	60ºlate	90ºlate	120ºlate	150ºlate	180ºlate
P1	108.472	94.8306	101.262	87.9403	83.9538	82.5622	76.7851	117.388	92.586	96.901	93.778	79.243	84.932	76.185	110.452	91.954	113.683	91.116	85.911	81.044	75.484
P2	177.693	186.123	174.974	177.799	183.913	190.394	182.754	190.276	183.554	180.826	175.161	183.532	198.169	190.229	177.22	197.041	187.68	176.63	192.136	200.36	165.282
P3	159.099	191.557	227.506	201.251	202.461	187.863	197.791	182.803	197.637	242.864	197.902	201.288	162.348	206.422	145.729	194.276	222.713	210.908	227.601	176.708	208.932
P4	168.675	133.463	138.492	142.02	151.856	132.113	144.483	162.047	136.377	125.866	143.197	166.854	134.635	133.642	180.602	146.848	138.592	130.225	154.198	131.323	137.549
P5	231.688	244.83	200.1	261.902	222.821	223.002	184.968	229.788	272.336	227.162	237.831	242.493	241.521	200.215	204.87	227.717	213.824	267.819	208.418	224.909	184.33
P6	117.944	118.9	122.163	104.411	111.64	101.74	97.5347	102.535	112.41	118.566	101.389	119.402	110.966	100.392	100.629	131.606	125.107	104.812	110.418	104.978	99.073
P7	140.674	115.187	103.779	118.712	97.7203	101.917	91.4257	131.8	111.154	98.442	112.738	94.415	102.132	79.369	137.275	107.027	106.47	118.706	95.835	95.891	79.489
P8	257.211	241.136	296.731	248.114	218.452	191.894	199.378	272.222	208.87	296.973	228.522	250.683	243.433	200.772	243.417	269.632	299.559	229.982	248.434	207.053	182.308
P9	146.676	131.025	116.832	120.268	121.649	114.892	127.607	139.399	122.248	129.691	124.608	127.065	115.626	116.219	148.077	130.441	134.079	123.139	132.545	130.394	120.498
P10	197.899	202.823	217.997	244.157	217.516	188.241	182.946	184.335	171.713	218.215	244.417	214.233	162.535	188.319	241.877	204.545	207.58	214.402	216.143	204.106	231.969
P11	157.832	145.824	137.257	118.945	118.574	118.455	124.463	170.969	145.845	135.37	118.734	133.033	128.566	129.144	180.157	147.876	132.623	130.113	133.442	111.643	124.96
P12	85.3924	69.8642	59.6141	62.054	59.8542	56.1991	51.2985	76.993	68.239	69.368	59.283	65.881	68.148	45.933	84.701	76.213	65.419	56.758	60.584	73.039	53.006
P13	125.293	154.912	139.709	124.114	126.396	135.83	148.437	117.85	140.834	130.019	100.962	139.495	145.239	142.111	106.203	156.041	150.423	116.296	155.607	135.901	164.867
P14	149.807	189.542	173.802	198.629	194.936	156.945	154.474	159.312	180.266	163.482	191.519	180.062	128.382	160.074	149.33	204.165	192.573	177.575	198.691	193.46	189.681
P15	263.802	184.1	166.008	170.233	144.66	139.418	95.8281	252.284	192.174	163.746	156.075	123.325	129.618	143.974	304.547	160.205	147.223	203.117	133.861	144.798	107.113
P16	119.973	198.99	148.375	180.324	142.352	155.252	184.387	104.708	169.023	128.358	154.985	124.123	184.774	195.247	141.992	229.33	142.908	166.963	160.045	204.885	199.214
P17	153.176	159.305	142.87	144.078	138.853	129.833	137.866	144.322	160.512	144.804	149.874	126.384	138.562	135.733	170.296	178.958	134.374	159.691	149.58	142.446	136.306
	122.642	137.915	134.484	128.937	124.327	128.868	125.62	137.53	122.819	129.75	142.28	120.052	120.527	122.697	134.164	141.972	134.554	132.98	125.512	127.213	116.342
