# Supplementary material for: Action history influences subsequent movement via two distinct processes
Source: eLife. 2017 Oct 23;6:e26713. doi: 10.7554/eLife.26713 (PMC5662285; doi:10.7554/eLife.26713)
Supplement: Figure 8—source data 1. [file elife-26713-fig8-data1.xlsx]

## Sheet: Figure 8A
Subject	LongPrep.25	LongPrep.45	LongPrep.65	ShortPrep.25	ShortPrep.45	ShortPrep.65		Fixed target at 45º
P1	-2.7	-0.65	-14	-0.4	-18.8	-31.85
P2	9.85	0.15	-7.5	12.5	0.9	-10.95
P3	2.1	0.75	-6.85	13.32	-3.781	-8.04
P4	1.45	-2.2	-13.7	12.83	-1.294	-13.07
P5	-7.078	-6.8324	-2.34	3.55	2.9	-6.25
P6	9.039	-0.0744	-20.38	20.25	0.549	-19.56
P7	22.05	26.05	2.75	4.55	-23.65	-43.7
P8	10.7	4.65	-5.8	15.35	-4.55	-13.05
P9	9.9	7	-3.45	16.1	-4.228	-16.41
P10	2.287	-6.0329	5.44	1.9	8.55	-12.7
P11	8.4	3.1	-1.15	18.65	0.75	-14.35
P12	-4.627	-1.0159	-9.32	17.5	-1.7	-18.55
P13	0.411	-3.521	-1.91	12.24	-0.917	-16.09
P14	10.35	-4.65	-11.45	7.4	-10.95	-21.8

## Sheet: Figure 8B
Subject	LongPrep.25	LongPrep.45	LongPrep.65	ShortPrep.25	ShortPrep.45	ShortPrep.65		Fixed target at 0º
P1	-8.8	-19.4	-23.2	-1.8	-22.3	-34.45
P2	-2.9	-16.4	-14.9	-1.1	-8.6	-14.4
P3	-5.25	-18.2	-13.7	0.63	-14.26	-27.52
P4	-11.25	-26.1	-34.2	-1.02	-18.61	-30.7
P5	-12.23	-7.02	-3.21	2.4	-8.3	-5.8
P6	-4.08	0	-18.17	16.38	-1.25	-18.57
P7	5.8	25.5	-23.4	-22.8	-38.9	-63.3
P8	8.1	11.3	-7.65	13.85	3.8	-23
P9	-3.75	1.2	-2.5	9.79	-6.58	-21.67
P10	-12.99	-22.96	-2.02	-4.3	-14.5	-15.45
P11	-4.75	-8.9	-2	3.35	-8.5	-18.85
P12	-8.54	-4.91	-13.28	15.5	-0.3	-17.2
P13	-6.53	-2.51	-9.7	10.55	-12.32	-28.04
P14	-14.85	-27.3	-40.85	-1.75	-24.6	-39.25

## Sheet: Figure 8C
Subject	LongPrep.25	LongPrep.45	LongPrep.65	ShortPrep.25	ShortPrep.45	ShortPrep.65		Differences between conditions
P1	-6.1	-18.75	-9.2	-1.4	-3.5	-2.65
P2	-12.75	-16.55	-7.4	-13.6	-9.5	-3.45
P3	-7.35	-18.95	-6.85	-12.69	-10.479	-19.46
P4	-12.7	-23.9	-20.5	-13.85	-17.316	-17.63
P5	-5.152	-0.1876	-0.87	-1.15	-11.2	0.45
P6	-13.119	0.0744	2.21	-3.87	-1.799	0.96
P7	-16.25	-0.55	-26.15	-27.35	-15.25	-19.6
P8	-2.6	6.65	-1.85	-1.5	8.35	-9.95
P9	-13.65	-5.8	0.95	-6.31	-2.352	-5.29
P10	-15.277	-16.9271	-7.46	-6.2	-23.05	-2.7
P11	-13.15	-12	-0.85	-15.3	-9.25	-4.55
P12	-3.913	-3.8941	-3.96	-2	1.4	1.35
P13	-6.941	1.011	-7.79	-1.69	-11.403	-11.91
P14	-25.2	-22.65	-29.4	-9.15	-13.65	-17.4
